# Supplementary material for: White Matter Development During Childhood and Adolescence: A Cross-sectional Diffusion Tensor Imaging Study
Source: Oxford University Press journal article supplement (doi:10.1093/cercor/bhi062), 2005-03-09

**Attachment 1:** Analysis without extent thresholding

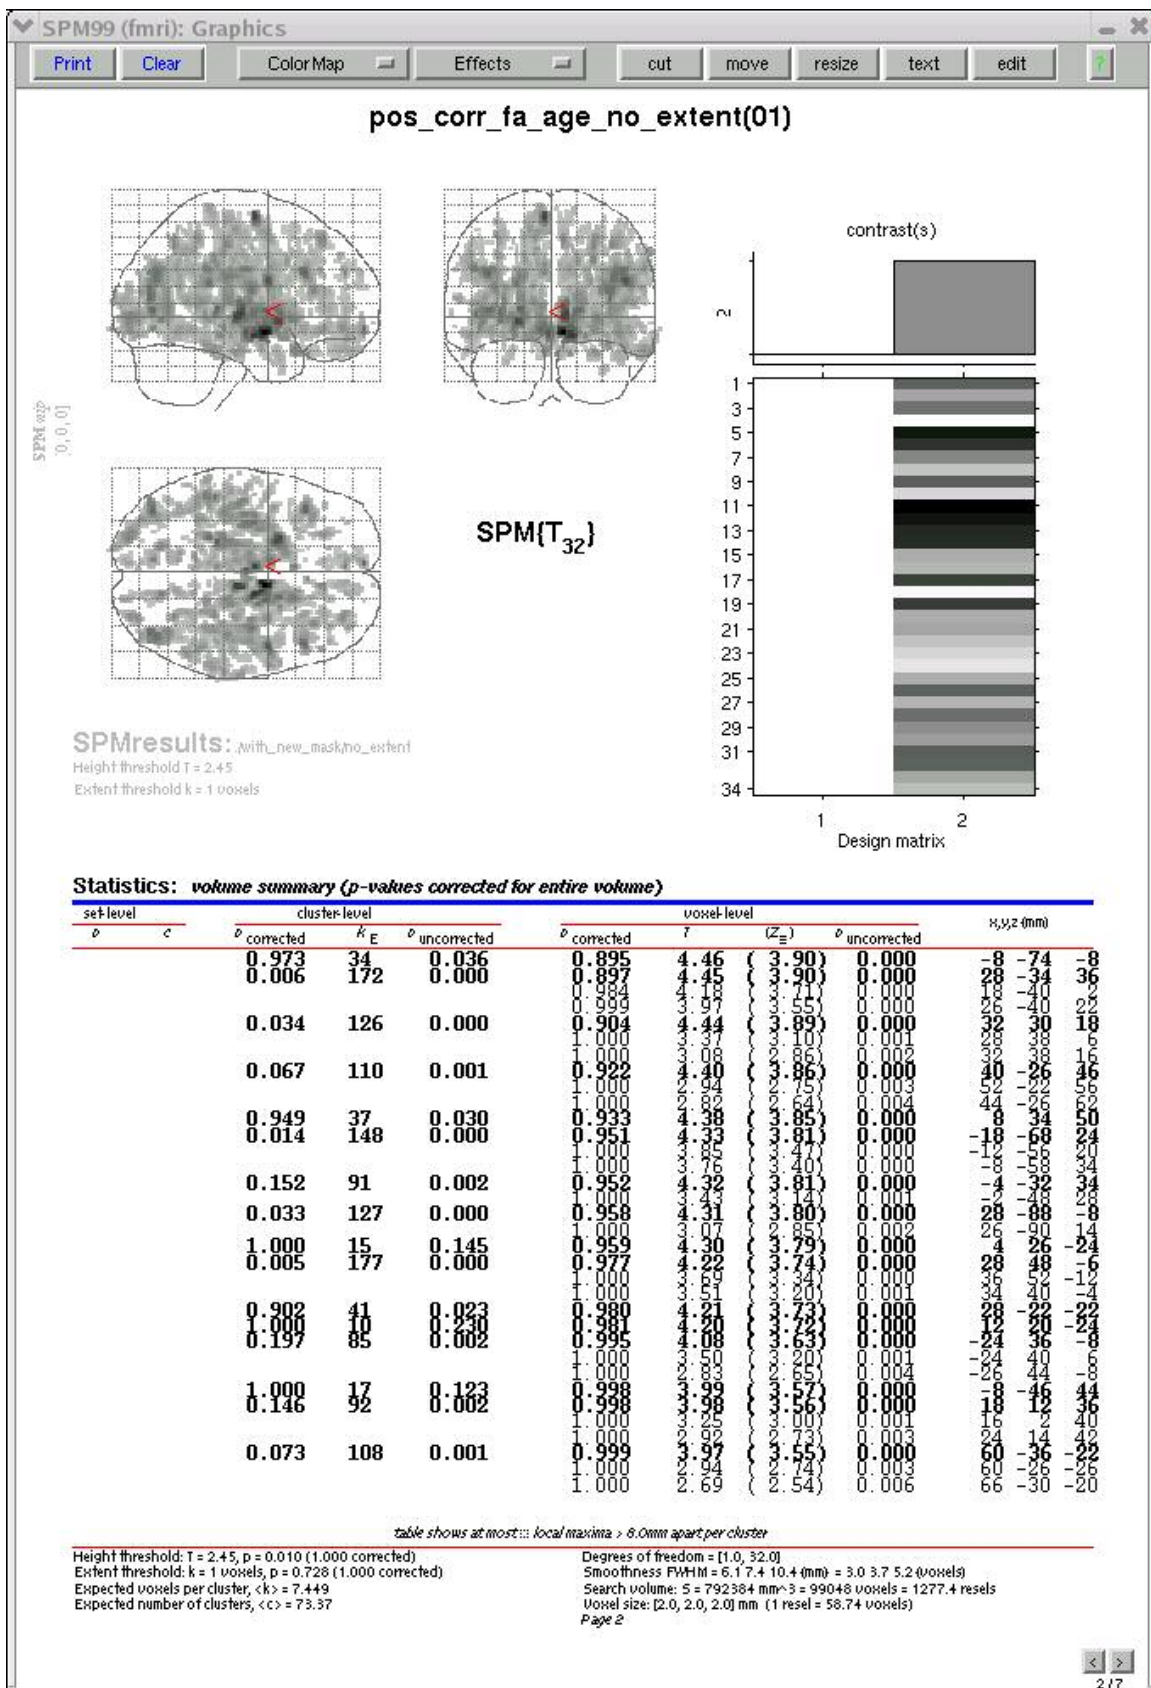

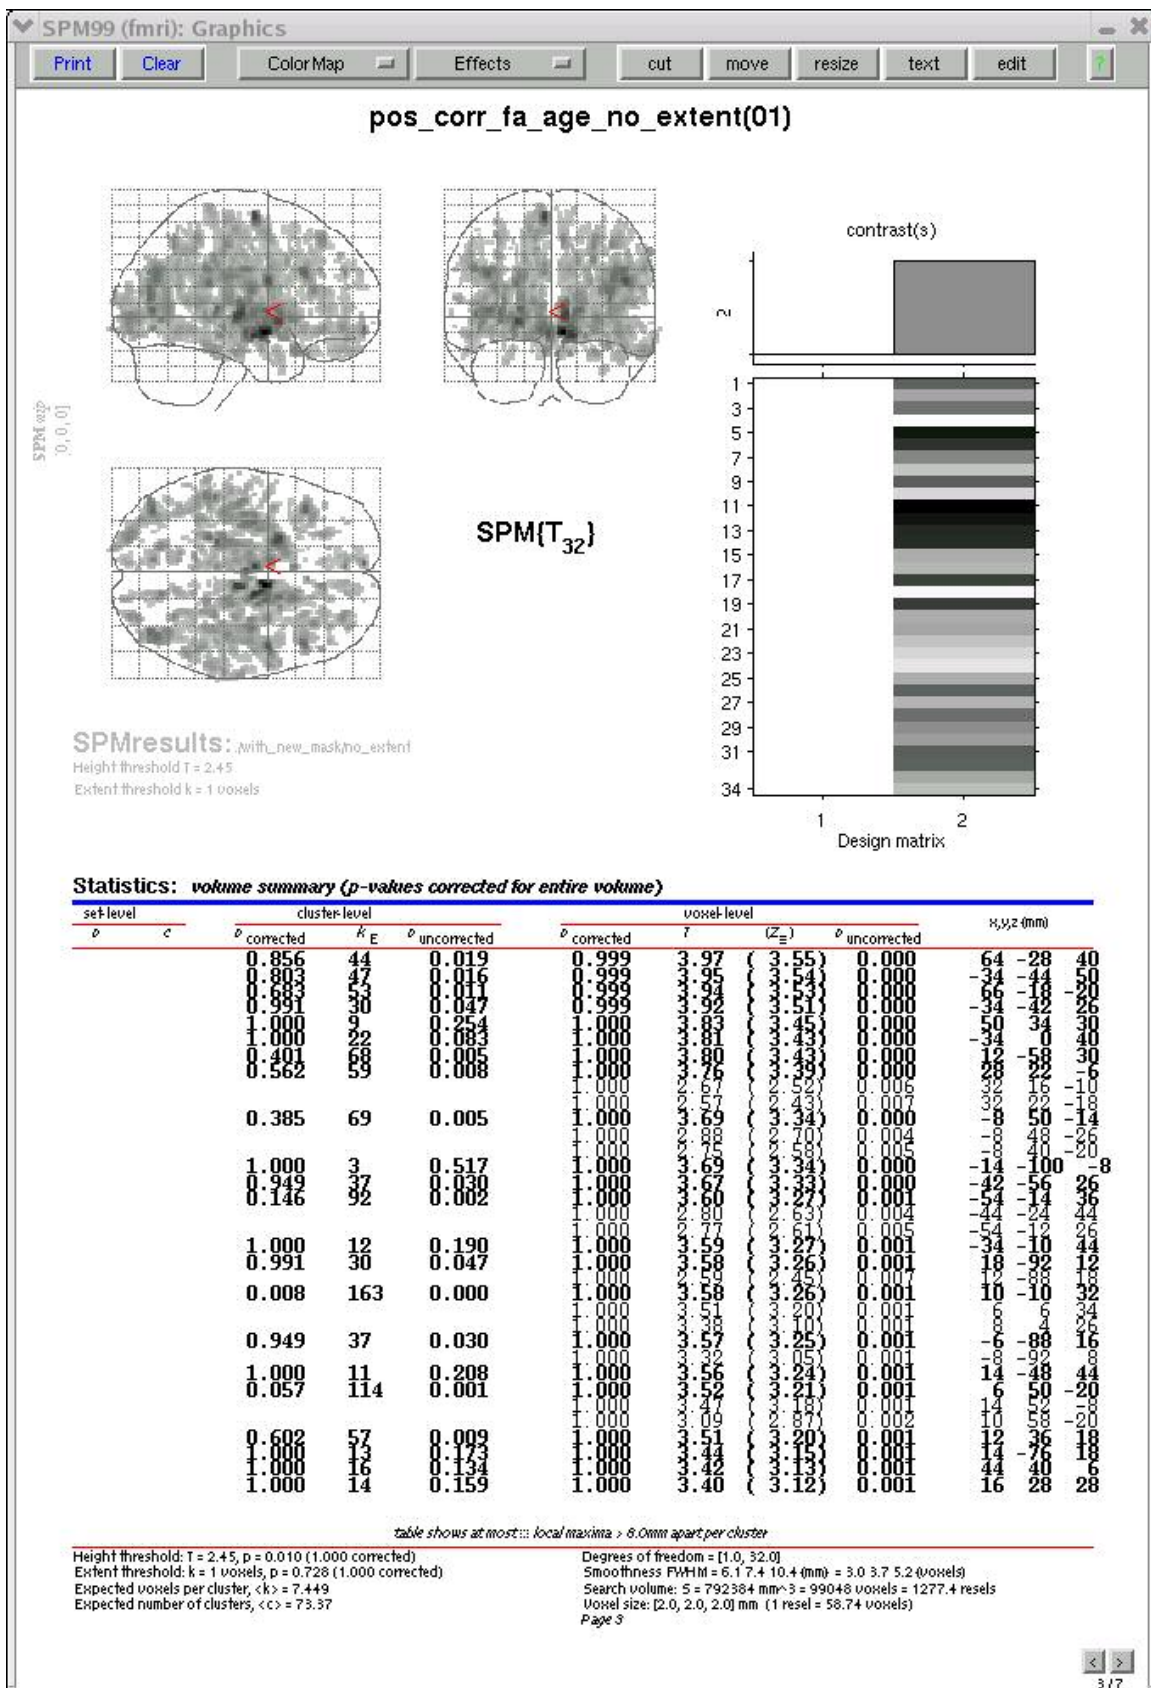

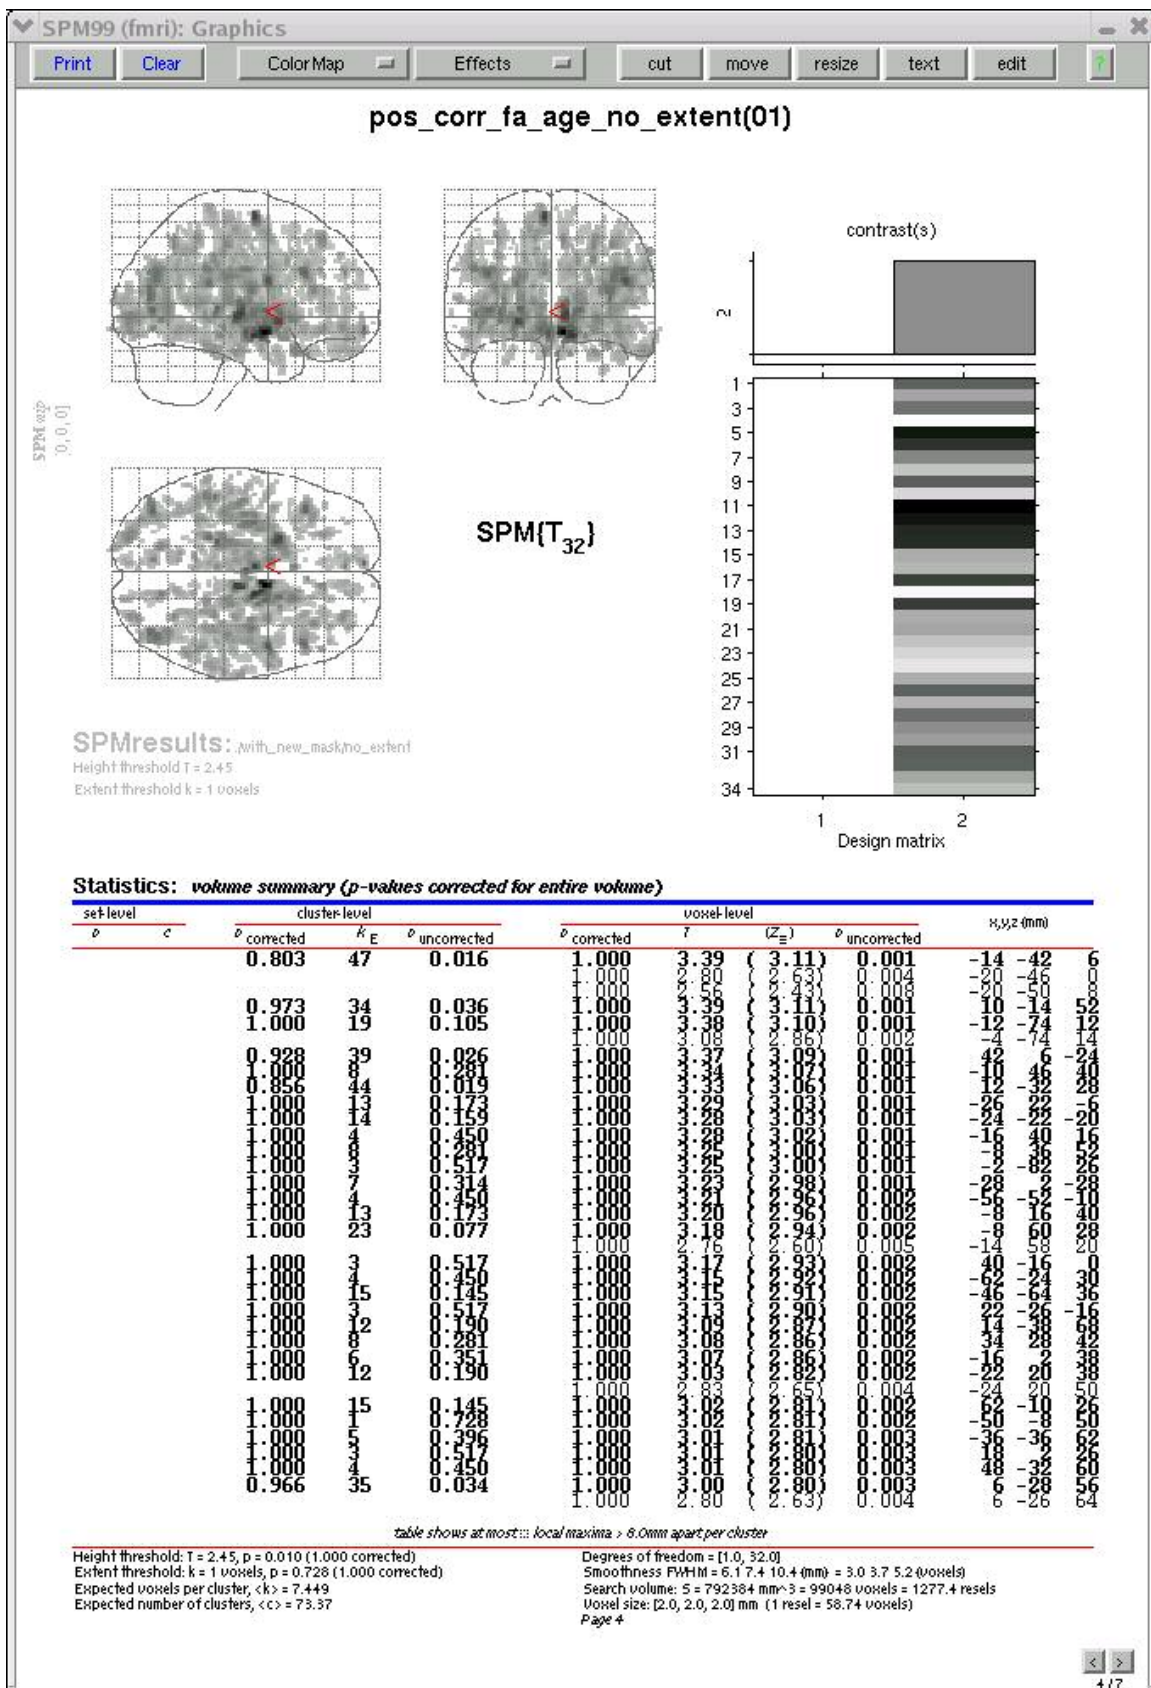

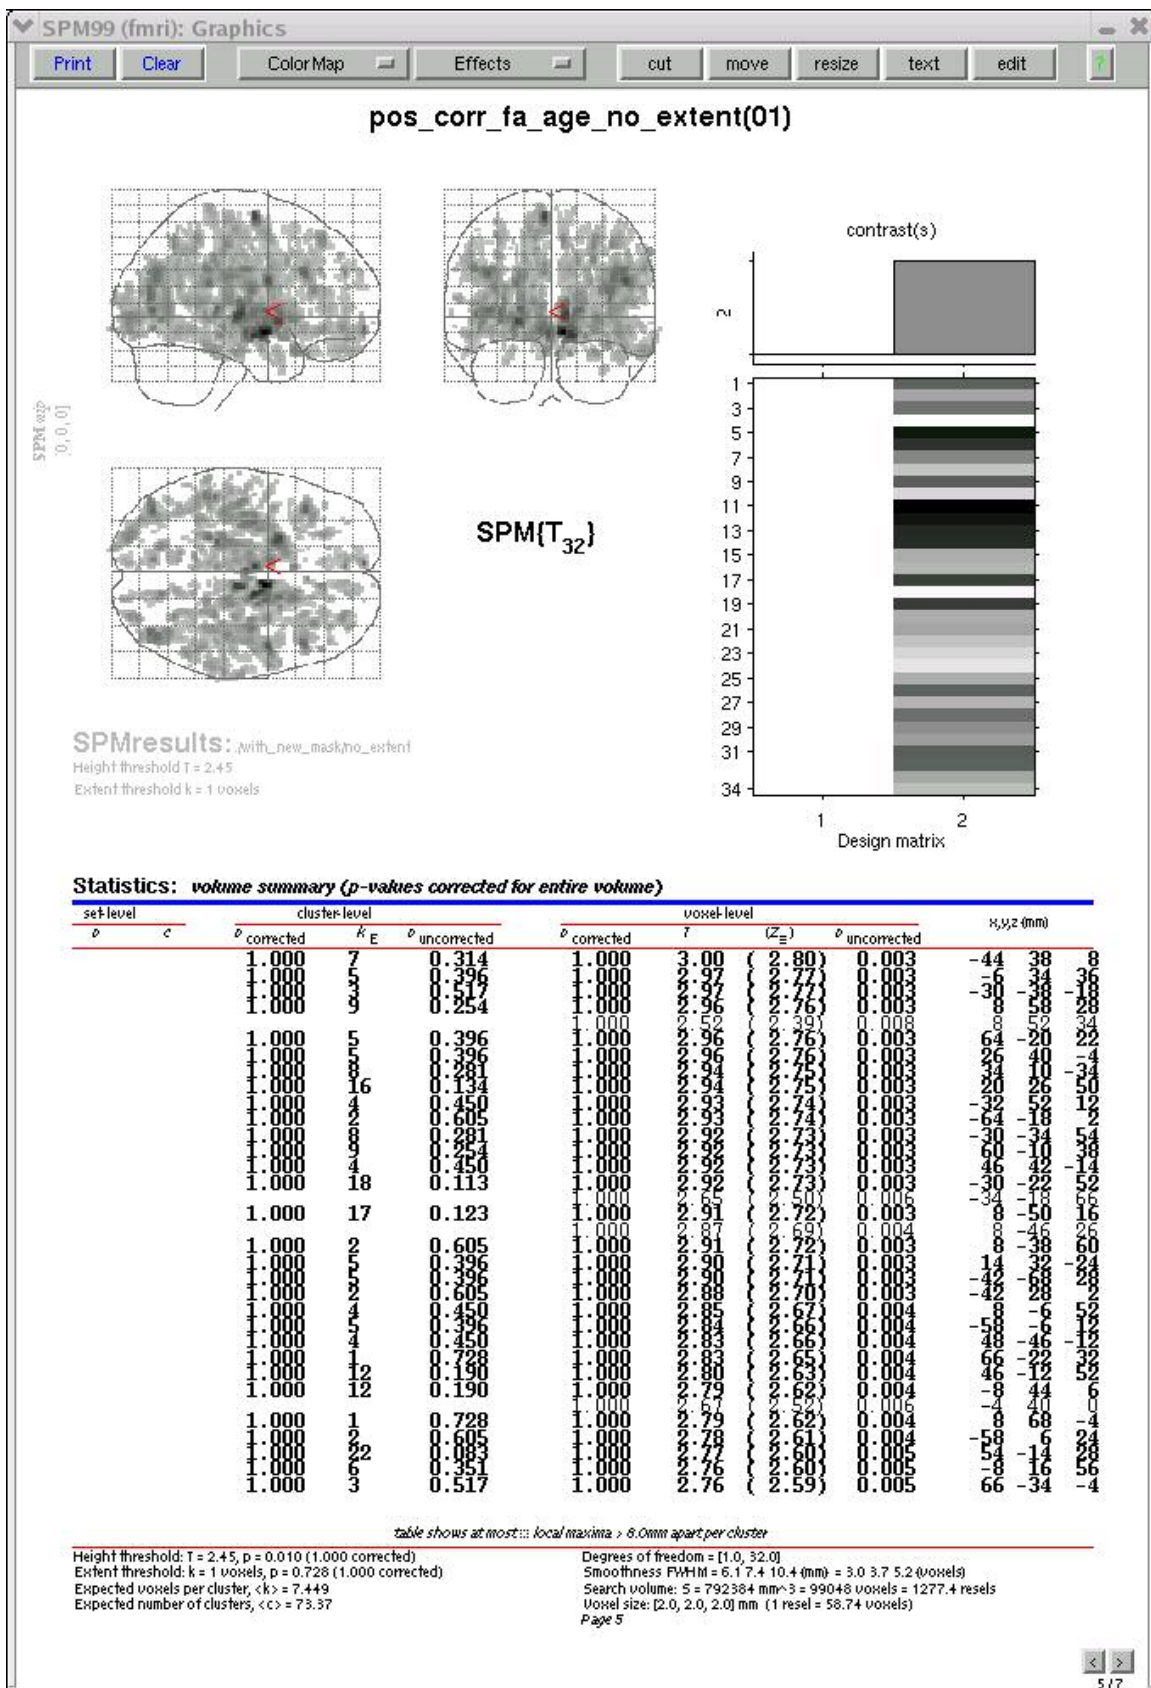

SPM{0 0 0}

SPM{T<sub>32</sub>}

SPMresults: /with\_new\_mask/no\_extent  
Height threshold T = 2.45  
Extent threshold k = 1 voxels

contrast(s)

1 2 3 5 7 9 11 13 15 17 19 21 23 25 27 29 31 34

1 2

Design matrix

| set-level |   | cluster-level    |       |                    | voxel-level      |          |                |                    | x,y,z (mm) |    |
|-----------|---|------------------|-------|--------------------|------------------|----------|----------------|--------------------|------------|----|
| $\rho$    | c | $\rho$ corrected | $K_E$ | $\rho$ uncorrected | $\rho$ corrected | $\gamma$ | $(Z_{\gamma})$ | $\rho$ uncorrected |            |    |
| 1.000     | 9 | 1.000            | 0.254 | 1.000              | 2.74             | (2.58)   | 0.005          | -4                 | 40         | 4  |
| 1.000     | 9 | 1.000            | 0.251 | 1.000              | 2.74             | (2.58)   | 0.005          | -54                | -46        | 4  |
| 1.000     | 9 | 1.000            | 0.258 | 1.000              | 2.74             | (2.58)   | 0.005          | 60                 | -50        | -4 |
| 1.000     | 9 | 1.000            | 0.605 | 1.000              | 2.72             | (2.57)   | 0.005          | -36                | -34        | -4 |
| 1.000     | 9 | 1.000            | 0.281 | 1.000              | 2.70             | (2.55)   | 0.005          | -16                | -6         | 4  |
| 1.000     | 9 | 1.000            | 0.605 | 1.000              | 2.70             | (2.54)   | 0.005          | -26                | -74        | -  |
| 1.000     | 9 | 1.000            | 0.605 | 1.000              | 2.70             | (2.54)   | 0.006          | 14                 | -86        | -  |
| 1.000     | 9 | 1.000            | 0.396 | 1.000              | 2.70             | (2.54)   | 0.006          | 42                 | 88         | 1  |
| 1.000     | 9 | 1.000            | 0.728 | 1.000              | 2.67             | (2.52)   | 0.006          | 34                 | -28        | -  |
| 1.000     | 9 | 1.000            | 0.605 | 1.000              | 2.66             | (2.51)   | 0.006          | -46                | 10         | 2  |
| 1.000     | 9 | 1.000            | 0.517 | 1.000              | 2.65             | (2.50)   | 0.006          | -16                | 46         | -  |
| 1.000     | 4 | 1.000            | 0.450 | 1.000              | 2.65             | (2.50)   | 0.006          | 18                 | -28        | 4  |
| 1.000     | 4 | 1.000            | 0.728 | 1.000              | 2.64             | (2.49)   | 0.006          | -4                 | -34        | 7  |
| 1.000     | 9 | 1.000            | 0.728 | 1.000              | 2.64             | (2.49)   | 0.006          | -22                | -52        | -  |
| 1.000     | 9 | 1.000            | 0.605 | 1.000              | 2.63             | (2.49)   | 0.006          | -2                 | 18         | 6  |
| 1.000     | 9 | 1.000            | 0.728 | 1.000              | 2.63             | (2.49)   | 0.006          | -18                | -92        | -1 |
| 1.000     | 9 | 1.000            | 0.605 | 1.000              | 2.62             | (2.47)   | 0.007          | 18                 | 60         | 1  |
| 1.000     | 9 | 1.000            | 0.728 | 1.000              | 2.60             | (2.46)   | 0.007          | -18                | 12         | 1  |
| 1.000     | 9 | 1.000            | 0.517 | 1.000              | 2.60             | (2.46)   | 0.007          | -16                | -46        | 2  |
| 1.000     | 9 | 1.000            | 0.728 | 1.000              | 2.60             | (2.46)   | 0.007          | -26                | -16        | 4  |
| 1.000     | 9 | 1.000            | 0.728 | 1.000              | 2.60             | (2.46)   | 0.007          | -26                | -32        | -1 |
| 1.000     | 9 | 1.000            | 0.728 | 1.000              | 2.59             | (2.45)   | 0.007          | -24                | 16         | 4  |
| 1.000     | 9 | 1.000            | 0.728 | 1.000              | 2.59             | (2.45)   | 0.007          | 10                 | 62         | 4  |
| 1.000     | 9 | 1.000            | 0.605 | 1.000              | 2.59             | (2.45)   | 0.007          | 20                 | -6         | 4  |
| 1.000     | 9 | 1.000            | 0.728 | 1.000              | 2.59             | (2.45)   | 0.007          | 24                 | -32        | 6  |
| 1.000     | 9 | 1.000            | 0.728 | 1.000              | 2.58             | (2.44)   | 0.007          | 8                  | -50        | 5  |
| 1.000     | 9 | 1.000            | 0.728 | 1.000              | 2.58             | (2.44)   | 0.007          | 70                 | -32        | 2  |
| 1.000     | 9 | 1.000            | 0.728 | 1.000              | 2.57             | (2.43)   | 0.008          | 18                 | 62         | 2  |
| 1.000     | 9 | 1.000            | 0.728 | 1.000              | 2.57             | (2.43)   | 0.008          | -62                | -38        | 5  |
| 1.000     | 9 | 1.000            | 0.728 | 1.000              | 2.57             | (2.43)   | 0.008          | -62                | -58        | 5  |
| 1.000     | 9 | 1.000            | 0.605 | 1.000              | 2.56             | (2.42)   | 0.008          | -8                 | 24         | 2  |

Height threshold:  $T = 2.45$ ,  $p = 0.010$  (1,000 corrected)  
 Extent threshold:  $k = 1$  voxels,  $p = 0.728$  (1,000 corrected)  
 Expected voxels per cluster,  $\langle k \rangle = 7.449$   
 Expected number of clusters,  $\langle c \rangle = 73.37$

Degrees of freedom = [1.0, 32.0]  
 Smoothness FWHM =  $6.17 \pm 10.4$  (mm) =  $3.0 \pm 3.7$  (2 voxels)  
 Search volume:  $S = 792384$  voxels =  $39048$  voxels =  $1277.4$  resels  
 Voxel size: [2.0, 2.0, 2.0] mm (1 resel =  $58.74$  voxels)  
 Page 6



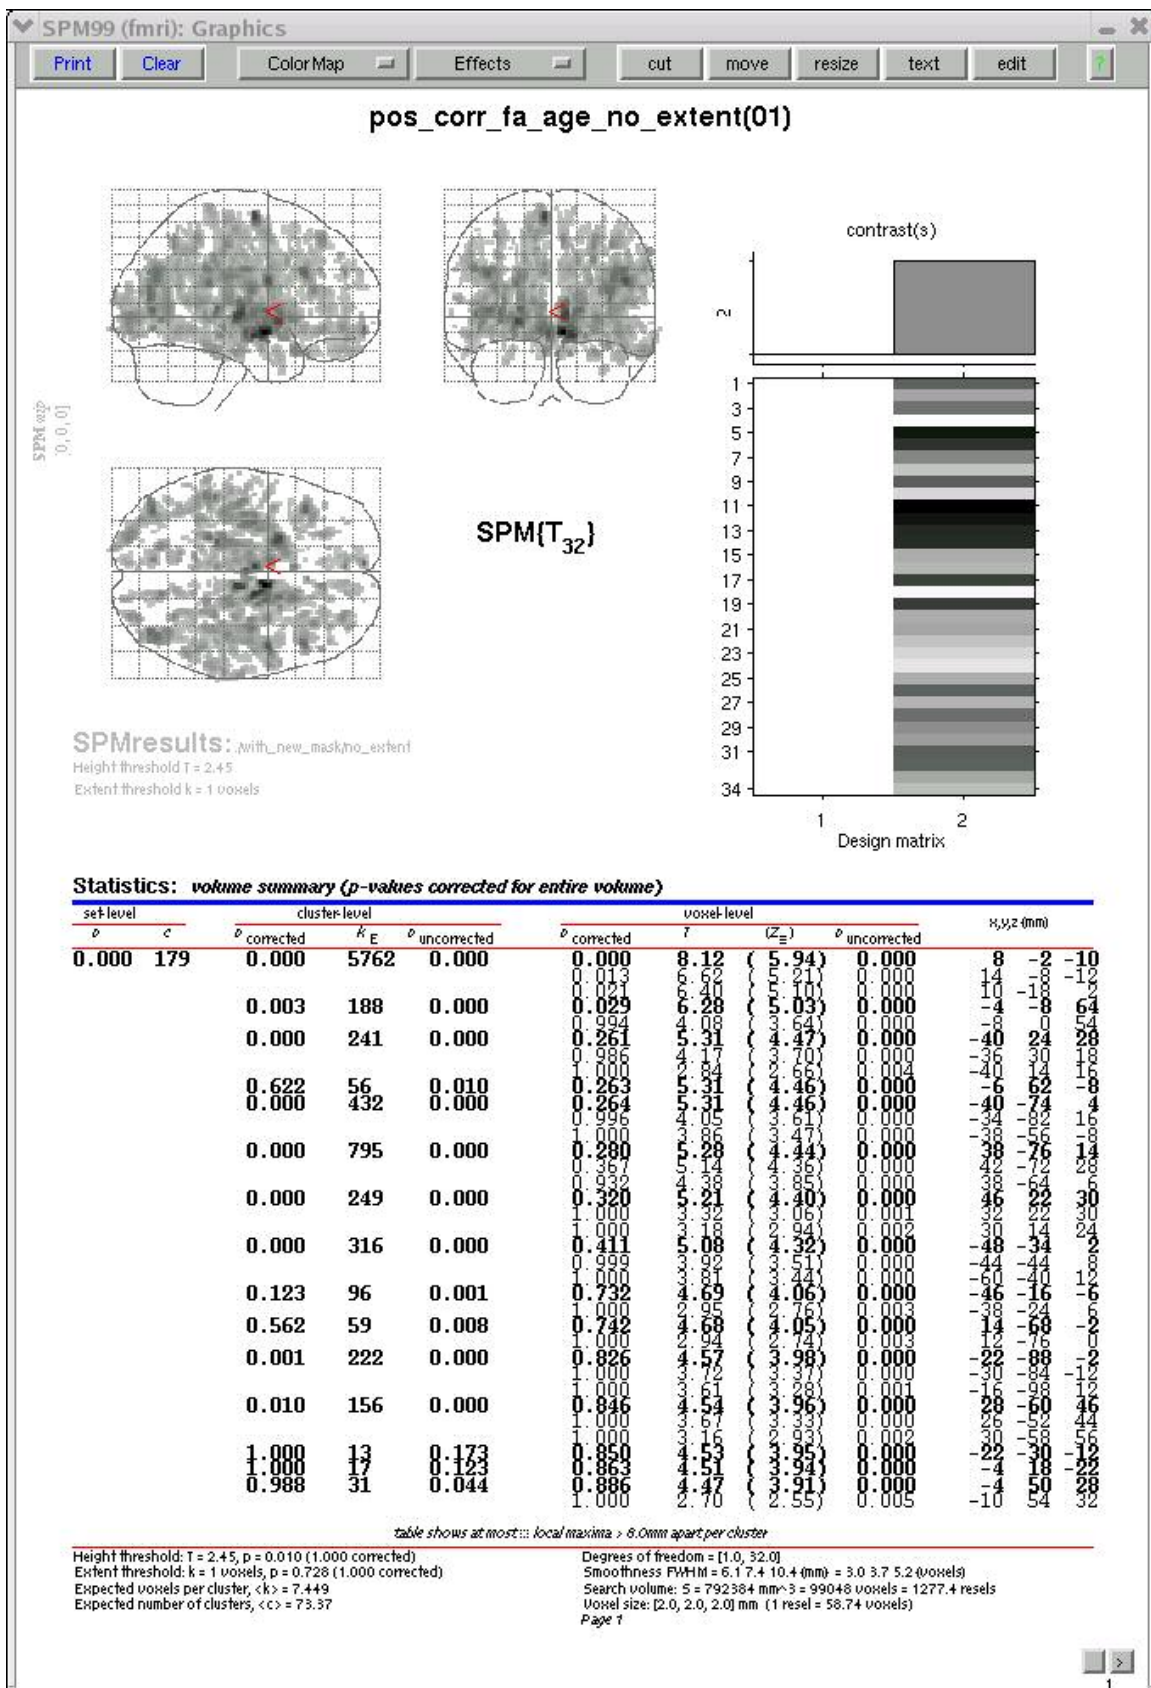

Supplement: bhi062_Supplementary_Data.zip [file bhi062_Supplementary_Data.zip › bhi062supp1.pdf]
