# Supplementary material for: White Matter Development During Childhood and Adolescence: A Cross-sectional Diffusion Tensor Imaging Study
Source: Oxford University Press journal article supplement (doi:10.1093/cercor/bhi062), 2005-03-09
Supplement: bhi062_Supplementary_Data.zip [file bhi062_Supplementary_Data.zip]

Archive with 2 entries (2 files):
- bhi062supp1.pdf
- bhi062supp2.pdf
