# Supplementary material for: White Matter Development During Childhood and Adolescence: A Cross-sectional Diffusion Tensor Imaging Study
Source: Oxford University Press journal article supplement (doi:10.1093/cercor/bhi062), 2005-03-09

**Attachment 2:** Regions in which there was a significant increase in FA values with age in the original analysis ( $p=0.05$  with extent thresholding, shown in red), and regions in which there was a significant increase in FA values with age in a follow-up analysis of  $p=0.01$  and no extent thresholding (shown in green). Areas of overlap are shown in yellow.

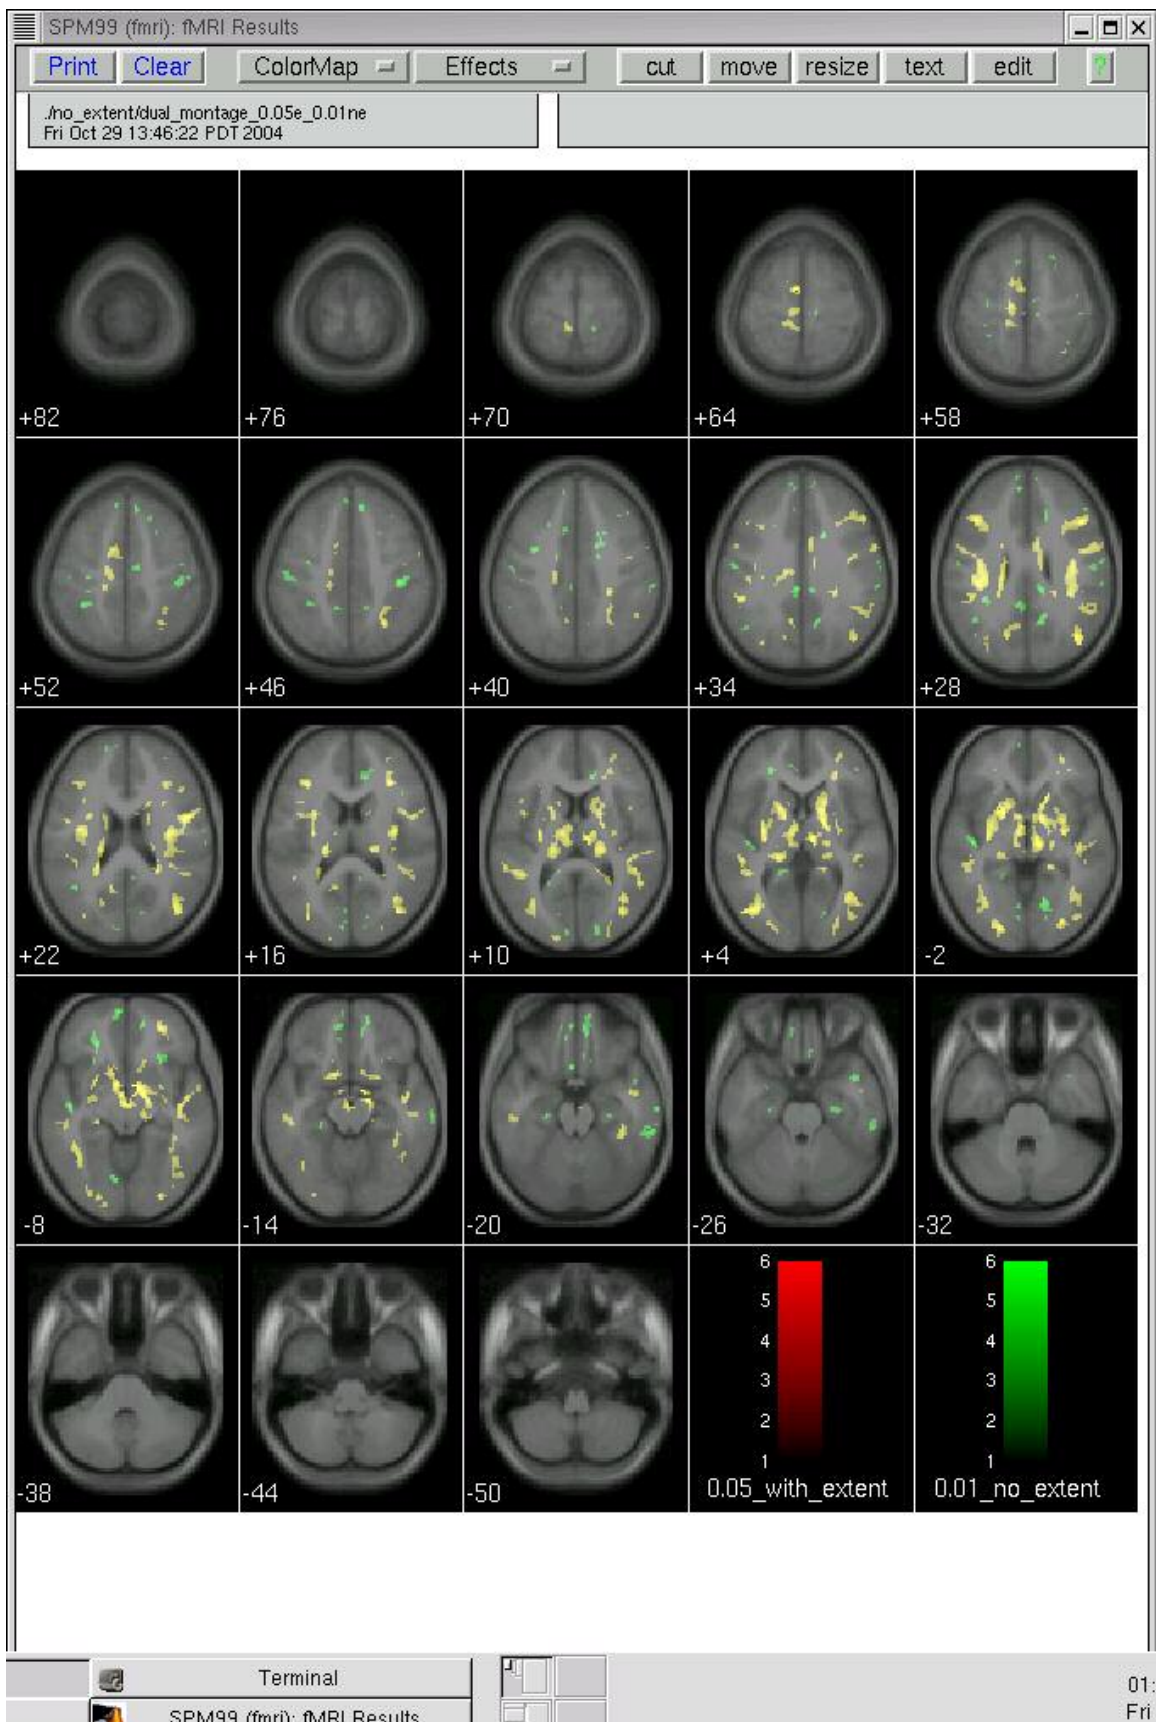

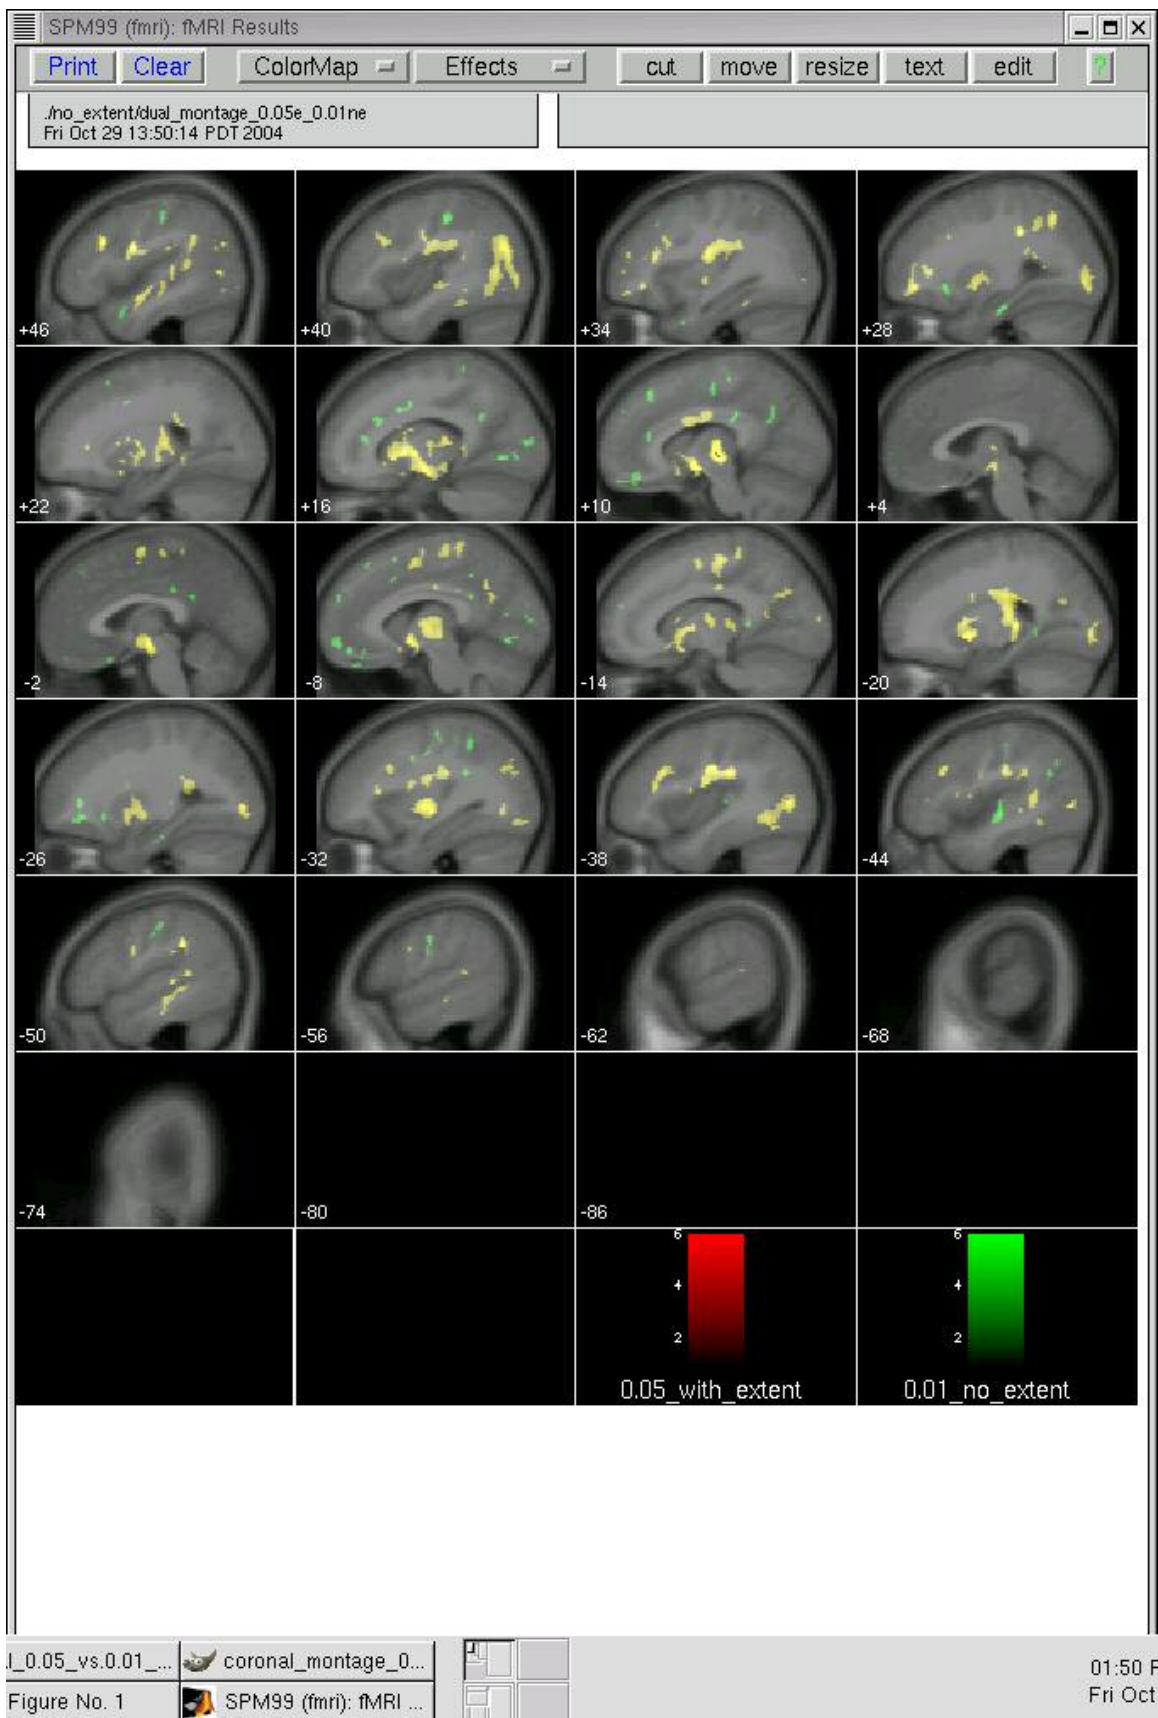

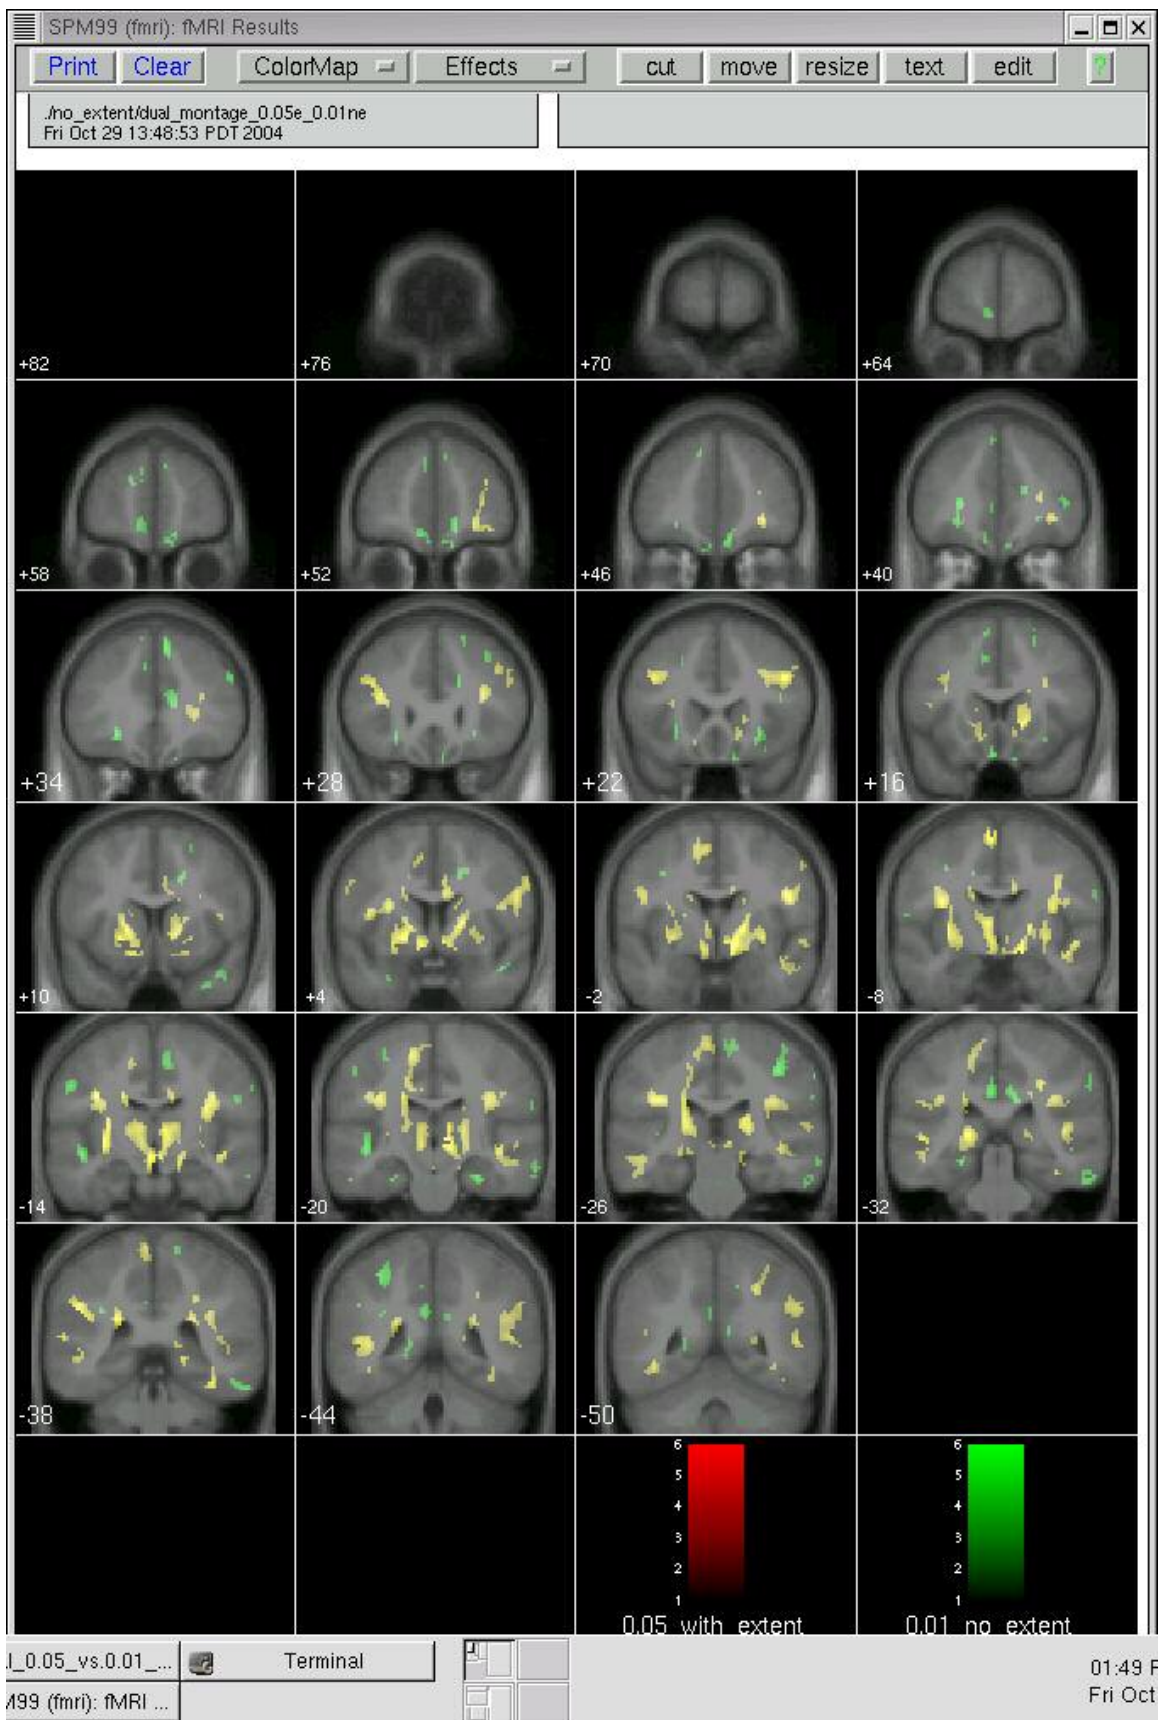

Supplement: bhi062_Supplementary_Data.zip [file bhi062_Supplementary_Data.zip › bhi062supp2.pdf]
